# Supplementary material for: Food procurement of staple cereals for world major cities in 2050
Source: Research Square preprint supplement (doi:10.21203/rs.3.rs-6499450/v1), 2025-05-20
Supplement: Supplementary file 1 [file 3802428cf6169126022e4de2.xlsx]

## Sheet: list_of_world_major_cities
Supplementary Data 1. List of the 208 world’s major cities studied in this study
Country	City	Location of city		Population (million people)	Number of 30-arcmin grid cells constituting of city
		Longitude (degree)	Latitude (degree)
Afghanistan_Islamic_State	Kabul	69.25	34.75	3.77111	1
Algeria	Souachette	3.25	36.75	4.38448	1
Angola	Luanda	13.25	-8.75	14.915	1
Argentina	Buenos_Aires	301.512	-34.75	14.2074	2
Australia	Sydney	151.25	-33.75	2.38642	1
Austria	Wien	16.25	48.25	2.17492	1
Azerbaijan	Baku	49.75	40.25	2.1496	1
Bangladesh	Dhaka	90.091	23.88	121.626	30
Bangladesh	Rajshahi	88.941	25.619	15.9612	5
Bangladesh	Chittagong	91.75	22.25	5.31795	1
Belgium	Brussel	4.25	50.75	2.31359	1
Brazil	Sao_Paulo	313.303	-23.539	24.9447	4
Brazil	Rio_de_Janeiro	316.663	-22.75	12.0073	2
Brazil	Belo_Horizonte	316.037	-19.75	4.99717	2
Brazil	Salvador	321.75	-12.75	3.45678	1
Brazil	Fortaleza	321.25	-3.75	3.21938	1
Brazil	Goiania	310.75	-16.75	2.51635	1
Brazil	Belem	311.75	-1.25	2.44752	1
Brazil	Curitiba	310.75	-25.25	2.22512	1
Brazil	Porto_Alegre	308.75	-29.75	2.02018	1
Burkina_Faso	Ouagadougou	358.25	12.25	2.94861	1
Cambodia	Phnom_Penh	104.75	11.75	3.12478	1
Cameroon	Douala	9.75	4.25	3.21924	1
Cameroon	Yaounde	11.75	3.75	2.99032	1
Canada	Toronto	280.54	43.75	5.87832	2
Canada	Montreal	286.25	45.75	2.33893	1
Chile	Santiago	289.25	-33.52	8.38114	2
China	Suzhou	120.855	31.142	84.836	16
China	Dongguan	113.676	22.881	67.0188	9
China	Langfang	116.627	39.598	50.9536	11
China	Zhengzhou	113.849	34.832	42.5278	16
China	Chuzhou	118.231	32.229	26.8349	8
China	Taian	116.969	36.078	19.9651	8
China	Shijiazhuang	114.103	37.747	18.1009	6
China	Wenzhou	120.84	28.355	15.5575	5
China	Swatow	116.48	23.433	14.5925	4
China	ZhuZhou	113.056	27.819	14.4794	6
China	Weifang	119.354	36.547	12.1799	4
China	Xian	108.758	34.25	11.9122	3
China	Putian	118.698	25.37	10.3492	3
China	Shen_Yang	123.25	41.627	8.54081	2
China	Maoming	110.447	21.864	7.53341	3
China	Xuzhou	117.374	34.225	7.41641	3
China	Chongqing	106.487	29.75	6.54884	2
China	Harbin	126.75	45.75	5.56323	1
China	Chengdu	103.75	30.75	5.35565	1
China	Nanning	108.641	23.337	5.26281	2
China	Lanzhou	102.881	36.467	5.06381	2
China	Fuyang	115.489	33.011	4.35368	2
China	Nanchang	115.75	28.75	4.12155	1
China	Xiangyang	112.25	32.505	4.11503	2
China	Changchun	125.25	43.75	4.01335	1
China	Urumqi	87.75	43.75	3.77821	1
China	Guiyang	106.75	26.75	3.37834	1
China	Kunming	102.75	25.25	3.11915	1
China	Handan	114.75	36.75	2.61904	1
China	Dalian	121.75	38.75	2.5053	1
China	Hohhot	111.75	40.75	2.44502	1
China	Yinchuan	106.25	38.25	2.29684	1
China	Xiaogan	113.75	30.75	2.06479	1
Colombia	Bogota	285.75	4.75	12.0294	1
Colombia	Medellin	284.25	6.25	4.67323	1
Colombia	Barranquilla	285.25	10.75	2.74139	1
Colombia	Cali	283.25	3.25	2.50238	1
Congo_Dem_Rep	Mbuji_Mayi	23.75	-6.25	5.01021	1
Congo_Dem_Rep	Lubumbashi	27.25	-11.75	2.97264	1
Congo_Rep	Brazzaville	15.25	-4.25	8.55927	1
Cote_d'Ivoire	Abidjan	355.927	5.25	5.758	2
Ecuador	Guayaquil	280.25	-2.25	2.99323	1
Egypt	Cairo	31.142	30.412	61.9976	12
Egypt	Asyut	30.917	27.75	7.25375	3
Egypt	Luxor	32.388	26.112	5.81661	2
El_Salvador	San_Salvador	270.75	13.75	2.88856	1
Ethiopia	Addis_Ababa	38.75	9.25	2.90116	1
Ethiopia	Shashemene	37.75	7.25	2.2484	1
France	Paris	2.25	48.75	8.95931	1
Germany	Duesseldorf	6.965	51.25	4.98638	2
Germany	Stuttgart	9.25	48.75	2.1127	1
Ghana	Accra	359.1	6.183	10.1548	2
Guatemala	Guatemala_City	269.25	14.75	3.39369	1
Haiti	Port-au-Prince	287.75	18.75	4.32449	1
India	Patna	85.157	25.816	118.364	29
India	New_Delhi	77.749	28.595	100.07	25
India	Kolkata	88.036	22.994	67.1322	15
India	Jaunpur	82.446	25.949	60.0238	18
India	Sitapur	80.599	27.132	50.6834	18
India	Navi_Mumbai	73.145	19.121	34.682	5
India	Kishanganj	87.982	25.824	30.0123	10
India	Coimbatore	76.528	10.756	23.5167	8
India	Bengaluru	77.628	12.807	21.8957	5
India	Chennai	79.999	12.801	19.2945	5
India	Dhanbad	86.625	24.068	18.4207	6
India	Vadodara	72.864	21.92	14.7255	3
India	Ellore	81.454	16.791	12.3023	5
India	Hyderabad	78.426	17.343	11.6459	3
India	Aurangabad	91.281	26.25	11.6073	5
India	Chandipur	91.967	24.334	8.92056	3
India	Gorakhpur	83.233	27.25	8.86154	3
India	Tirunelveli	77.406	8.94	8.68556	3
India	Bareilly	79.253	28.126	8.40935	3
India	Jalandhar	75.609	31.19	8.16676	3
India	Cuttack	86.036	20.404	8.00435	3
India	Guwahati	74.75	32.894	7.60791	3
India	Indore	76.384	22.961	7.07852	2
India	Ahmedabad	72.75	23.25	6.16384	1
India	Tiruchirappalli	81.518	21.25	4.97883	2
India	Raipur	74.46	16.75	4.96549	2
India	Gwalior	78.984	10.75	4.62375	2
India	Jaipur	75.75	26.75	4.56844	1
India	Nagpur	79.25	21.25	3.43179	1
India	Rajkot	75.25	19.75	2.40112	1
India	Jaipur	78.25	26.25	2.33185	1
India	Rajkot	70.75	22.25	2.03123	1
Indonesia	Bekasi	107.045	-6.46	68.5075	10
Indonesia	Kota_Semarang	110.27	-7.367	23.2524	7
Indonesia	Surabaya	112.36	-7.535	21.0332	6
Indonesia	Denpasar	115.738	-8.75	5.29349	2
Indonesia	Medan	98.75	3.75	4.24733	1
Iran_Islamic_Rep	Tehran	51.254	35.75	14.1207	3
Iran_Islamic_Rep	Isfahan	51.75	32.75	2.4076	1
Iran_Islamic_Rep	Mashhad	59.75	36.25	2.40174	1
Iraq	Baghdad	44.25	33.415	8.01295	2
Italy	Napoli	13.591	41.189	5.27184	2
Italy	Milano	9.25	45.545	4.99927	2
Japan	Tokyo	139.57	35.706	20.0987	6
Japan	Osaka	135.892	34.892	19.6384	3
Japan	Fukuoka	130.75	33.75	2.04465	1
Jordan	Amman	35.75	31.75	2.22778	1
Kazakstan_Rep	Almaty	76.75	43.25	2.08224	1
Kenya	Nairobi	36.75	-1.25	6.67637	1
Kenya	Nakuru	34.75	-0.259	5.06284	2
Korea_Dem_People's_Rep	Pyongyang	125.75	39.25	2.72767	1
Korea_Rep	Suwon	127.015	37.359	30.9914	6
Korea_Rep	Busan	128.948	35.408	8.08486	3
Lebanon	Beirut	35.75	33.75	4.86424	1
Madagascar	Antananarivo	47.75	-18.75	2.87287	1
Malaysia	Kuala_Lumpur	101.75	3.124	8.52462	2
Mali	Bamako	352.25	12.75	3.57049	1
Mexico	Mexico_City	260.921	19.406	29.5925	6
Mexico	San_Pedro_Garza_Garcia	259.75	25.75	8.83828	1
Mexico	Guadalajara	257.176	20.892	7.5269	2
Mozambique	Maputo	32.75	-25.75	2.15345	1
Myanmar	Yangon	96.25	16.75	6.36225	1
Nepal	Kathmandu	85.413	27.321	16.9827	4
Nepal	Biratnagar	87.25	26.75	4.44392	1
Nepal	Dhangadhi	80.25	28.75	2.16821	1
Netherlands	Amsterdam	4.75	52.25	2.41207	1
Nigeria	Owerri	7.149	5.499	32.2165	11
Nigeria	Lagos	3.591	6.97	19.0786	4
Nigeria	Kano	8.386	11.848	13.6462	5
Nigeria	Abuja	7.25	9.25	2.98308	1
Nigeria	Ibadan	5.25	7.75	2.3453	1
Pakistan	Faisalabad	73.727	31.556	60.915	18
Pakistan	Islamabad	72.475	34.099	22.6457	7
Pakistan	Karachi	67.432	24.841	15.8415	2
Pakistan	Multan	71.623	30.09	13.1347	5
Pakistan	Hyderabad	68.75	27.75	2.43796	1
Peru	Lima	283.031	-12.031	7.79399	2
Philippines	Quezon	121.01	14.702	34.5519	6
Philippines	Cebu	123.75	10.25	3.64782	1
Philippines	Dabaw	125.75	7.25	2.48977	1
Portugal	Lisboa	350.75	38.75	2.63523	1
Qatar	Doha	51.25	25.25	3.53268	1
Romania	Bucharest	26.817	44.25	15.9899	3
Russian_Federation	Moscow	37.629	55.75	15.4614	2
Russian_Federation	Saint_Petersburg	30.25	59.75	3.50814	1
Rwanda	Kigali	29.809	-1.75	5.42187	2
Saudi_Arabia	Riyadh	46.75	24.75	5.39329	1
Saudi_Arabia	Jeddah	39.25	21.75	2.68167	1
Senegal	Dakar	342.75	14.75	4.2477	1
Singapore	Singapore	103.75	1.25	6.11795	1
South_Africa	Johannesburg	28.088	-26.116	13.4068	3
South_Africa	Durban	30.75	-29.75	2.94796	1
South_Africa	Cape_Town	18.75	-33.75	2.67091	1
Spain	Madrid	356.25	40.25	5.81742	1
Spain	Barcelona	2.25	41.25	3.49642	1
Sri_Lanka	Colombo	80.25	7.25	2.14981	1
Sudan	Khartoum	32.512	15.75	4.28778	2
Syrian_Arab_Rep	Damascus	36.25	33.513	5.57124	2
Syrian_Arab_Rep	Aleppo	37.25	36.25	3.92388	1
Thailand	Bangkok	100.58	13.75	19.99	2
Togo	Lome	1.25	6.25	3.41448	1
Tunisia	Tunis	10.25	36.75	2.85344	1
Turkey	Bursa	28.955	40.969	14.7111	3
Turkey	Ankara	32.75	39.75	4.37403	1
Turkey	Izmir	27.25	38.25	3.09474	1
Uganda	Kampala	32.75	0.25	4.42698	1
United_Arab_Emirates	Dubai	55.25	25.25	2.76029	1
United_Kingdom	London	359.837	51.569	11.4418	3
United_Kingdom	Manchester	357.997	53.497	4.1144	2
United_States	Los_Angeles	242.034	33.746	13.7742	4
United_States	Houston	264.529	29.75	5.44456	2
United_States	Fort_Worth	263.011	32.75	5.02297	2
United_States	Washington	282.974	38.974	4.93752	2
United_States	Miami	279.75	25.957	4.91475	2
United_States	New_York	285.75	40.75	4.60132	1
United_States	Chicago	272.25	41.75	4.29301	1
United_States	San_Francisco	237.75	37.75	3.12452	1
United_States	Columbus	275.75	33.75	2.57369	1
United_States	Boston	288.75	42.25	2.46339	1
United_States	Las_Vegas	244.75	36.25	2.44953	1
Uzbekistan_Rep	Toshkent	69.25	41.25	3.68499	1
Venezuela	Caracas	292.858	10.25	5.62315	2
Venezuela	Maracaibo	288.25	10.75	2.74773	1
Vietnam	Ho_Chi_Minh	106.543	10.617	19.054	3
Vietnam	Hanoi	105.975	20.901	18.6959	5
Yemen	Sanaa	44.25	14.559	5.69224	2
Zambia	Lusaka	28.25	-15.25	3.09726	1
